# Supplementary material for: Boosting sodium storage performance of Na0.44MnO2 through surface modification with conductive polymer PPy utilizing sonication-assisted dispersion
Source: Royal Society of Chemistry journal article supplement (doi:10.1039/d4dt02228a), 2024-01-01
Supplement: d4dt02228a1.pdf [file d4dt02228a1.pdf]

## Supporting Information

### **Boosting sodium storage performance of $\text{Na}_{0.44}\text{MnO}_2$ through surface modification with conductive polymer PPy utilizing sonication-assisted dispersion**

Lingling Xie <sup>a,c,\*</sup>, Xinwei Wang <sup>b,c</sup>, Changle Xia <sup>b,c</sup>, Huilin Huang <sup>b,c</sup>, Limin Zhu <sup>b,c</sup>, Qing Han <sup>b,c</sup>, Xuejing Qiu <sup>a,c</sup>, Xiaoyu Cao <sup>b,c</sup>

<sup>a</sup> *School of Environmental Engineering, Henan University of Technology, Zhengzhou 450001, China*

<sup>b</sup> *School of Chemistry and Chemical Engineering, Henan University of Technology, Zhengzhou 450001, China*

<sup>c</sup> *Henan Engineering Technology Research Center of Electrochemical Energy Storage, Key Laboratory of High Specific Energy Materials for Electrochemical Power Sources of Zhengzhou City, Henan University of Technology, Zhengzhou 450001, China*

\* Corresponding author

*Email address:* linglingxie@haut.edu.cn (L. Xie)

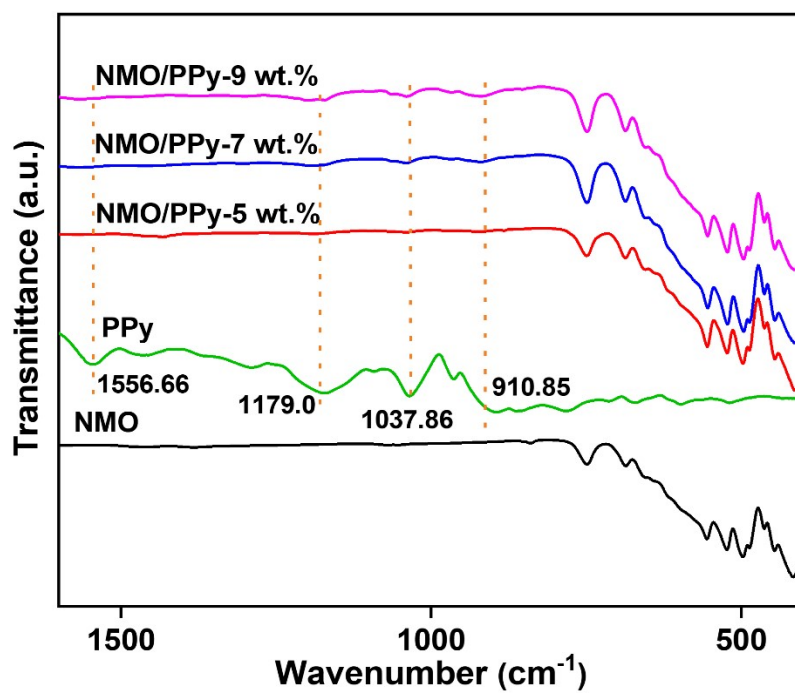

**Figure S1.** FT-IR spectra of NMO, PPy, and different NMO/PPy composites in the range of 1600-400 cm<sup>-1</sup>.

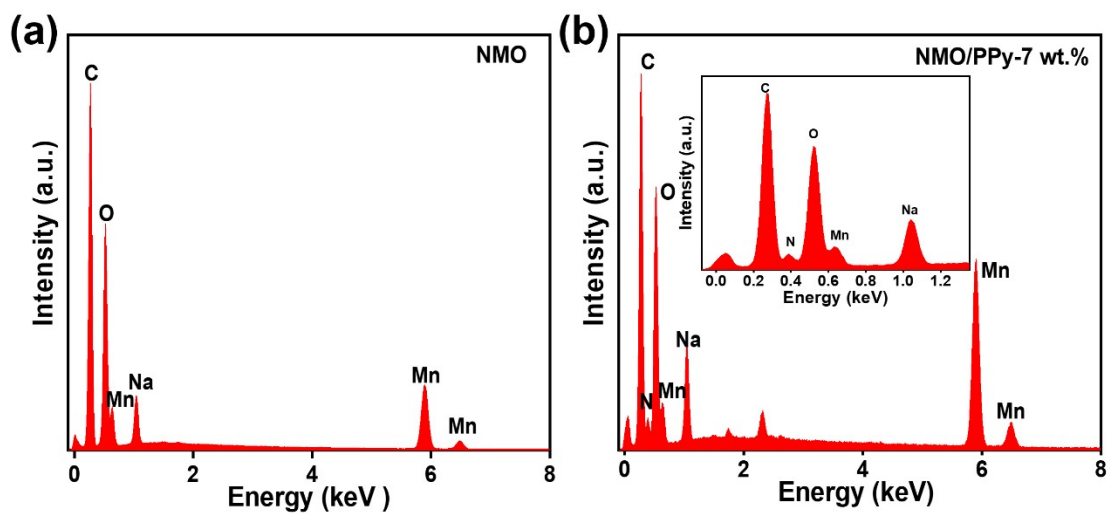

Figure S2. (a, b) EDS comparison between NMO and NMO/PPy-7 wt.%.

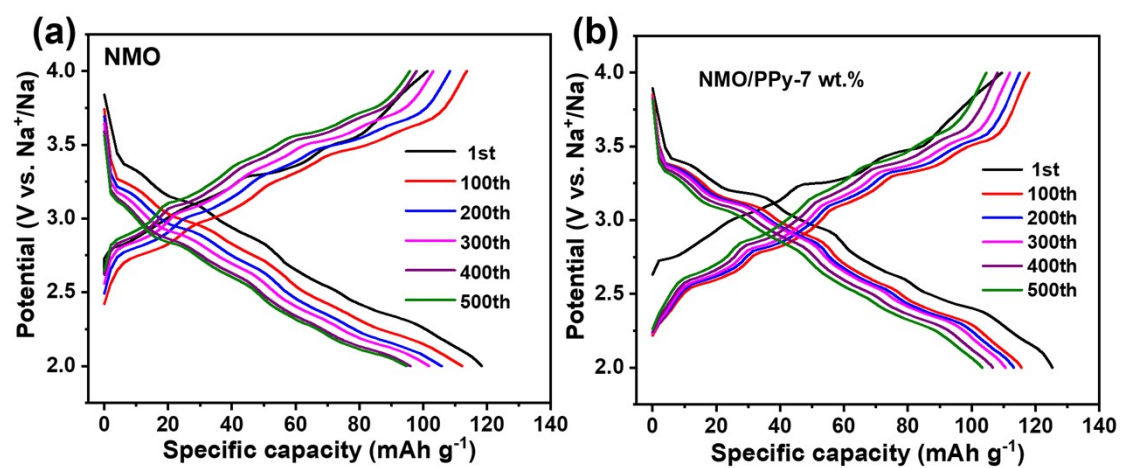

**Figure S3.** (a, b) Comparison of charge-discharge curves with different cycles for NMO and NMO/PPy-7 wt.%.

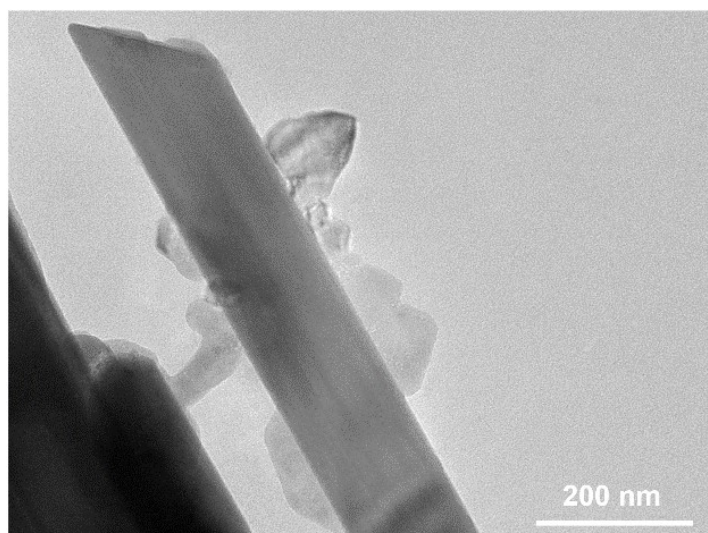

**Figure S4.** TEM image of NMO/PPy-7 wt.% after 500 cycles at 1 C.

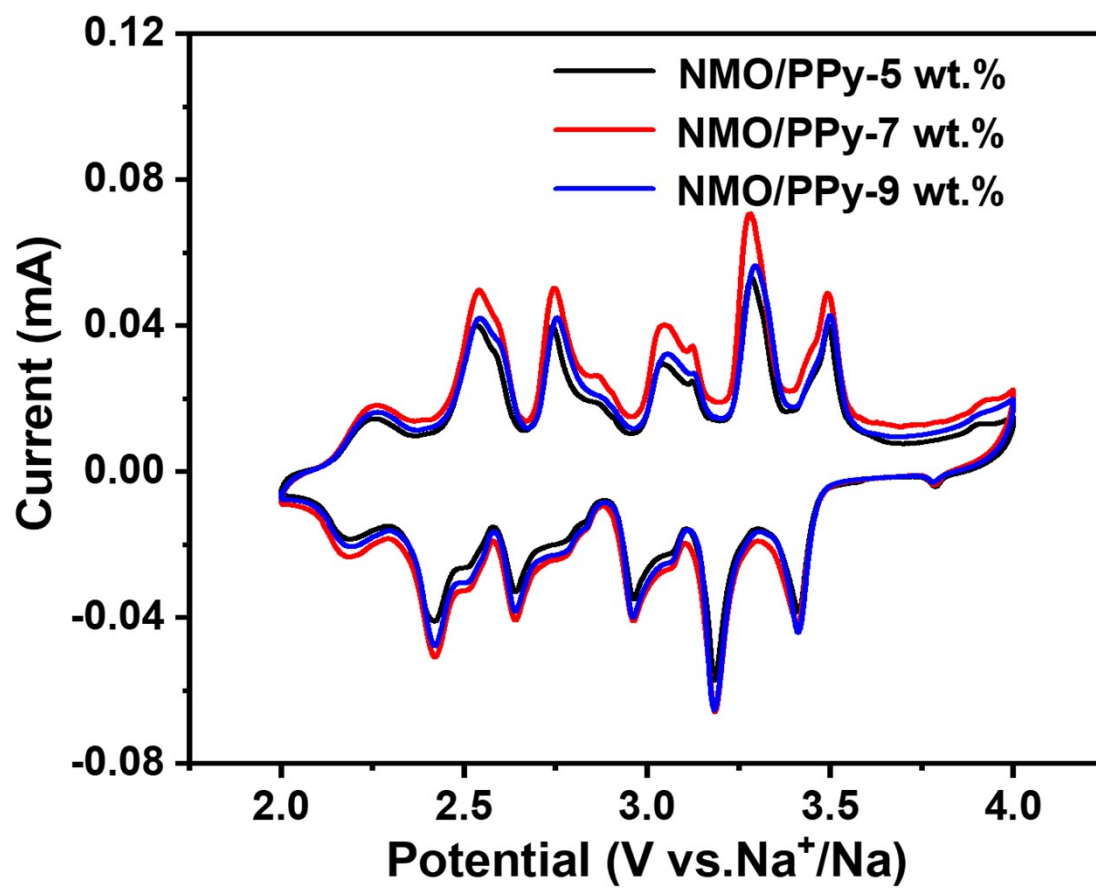

Figure S5. Comparative CV of different NMO/PPy composites in the second cycle.
